# Supplementary material for: Neuroblastomas in Eastern China: a retrospective series study of 275 cases in a regional center
Source: PeerJ. 2018 Sep 17;6:e5665. doi: 10.7717/peerj.5665 (PMC6148411; doi:10.7717/peerj.5665)
Supplement: Supplemental Information 1 — Outcome: 1, dead of disease, 0, alive or lost follow-up. [file peerj-06-5665-s001.xlsx]

## Sheet: 神经母细胞瘤总结
stage	time（months)	outcome
4	7	0
2	97	0
4S	96	0
4	21	1
3	63	1
4S	95	0
4	94	0
3	8	1
1	95	0
4S	93	0
4	25	1
3	93	0
1	92	0
1	91	0
1	91	0
4	30	1
3	100	0
4	8	0
1	87	0
4	47	1
4	27	1
4	50	1
4S	84	0
4	64	1
2	84	0
4	28	0
3	19	1
3	83	0
3	44	1
4S	82	0
4	19	1
4	13	1
2	81	0
4	20	1
4	52	1
1	81	0
4	84	0
1	81	0
3	80	0
4	34	1
4	84	0
3	80	0
4S	80	0
3	53	1
4	23	1
3	2	1
1	78	0
3	82	0
2	75	0
4	34	1
1	76	0
4	57	1
4	8	1
4	75	0
4	52	1
3	75	0
4	41	1
3	25	0
4	13	0
4	7	0
4	5	0
1	72	0
1	71	0
4	36	0
4	70	0
4	29	1
4	53	1
4	56	1
4	77	0
3	68	0
1	67	0
4	37	0
3	66	0
1	66	0
4	69	0
3	66	0
3	65	0
4	22	0
4	65	0
3	15	1
3	67	0
4S	65	0
1	63	0
4	63	0
4S	63	0
1	64	0
4	64	0
3	62	0
3	62	0
1	62	0
1	62	0
4S	62	0
4	0.5	1
4	60	0
1	60	0
4	60	0
1	60	0
4	59	0
1	59	0
1	64	0
3	59	0
1	59	0
3	58	0
4	9	1
4	58	0
4	58	0
3	60	0
1	60	0
1	60	0
4	11	0
3	56	0
4	13	0
1	55	0
3	62	0
2	55	0
1	55	0
1	55	0
3	17	1
4	54	0
4	1.5	1
1	53	0
1	53	0
4	35	1
4	3	1
4	15	1
4S	52	0
3	51	0
4	50	0
1	51	0
4	45	1
1	49	0
3	49	0
4	3	0
4S	49	0
1	49	0
3	56	0
4	48	0
4	48	0
3	47	0
3	47	0
1	47	0
4	47	0
4	46	0
3	46	0
4S	46	0
1	46	0
1	46	0
1	44	0
4	44	0
4	44	0
1	44	0
3	1	1
1	43	0
3	43	0
4	9	0
2	43	0
3	42	0
4	11	0
3	42	0
3	41	0
4	44	0
4	24	1
4	32	1
4S	40	0
4	1	1
4	21	1
4	40	0
1	38	0
4	37	0
3	36	0
4	8	1
4	36	0
3	36	0
3	8	1
4	0.5	1
4	8	1
4S	35	0
3	18	1
4	34	0
4	34	0
4S	34	0
3	1	1
3	38	0
4	37	0
4	37	0
3	7	1
1	33	0
2	33	0
3	37	0
4	38	0
4	30	1
4	21	1
4	6	1
1	32	0
1	31	0
2	31	0
4	31	0
3	30	0
4	30	0
4	20	1
3	32	0
4	63	0
4	36	0
4	30	0
4	32	0
4	29	0
1	29	0
4	24	1
4	34	0
4	27	1
4	24	1
4	27	1
4	15	1
3	27	1
3	16	1
4	4	0
4	32	0
3	52	0
4	51	0
4	15	1
4	10	1
4	28	1
4	7	0
3	8	1
4	22	1
4	2	1
4	44	0
4	6	1
3	24	1
2	21	1
4	6	1
1	40	0
3	11	1
4	6	1
4	14	1
4	12	1
4	29	1
3	27	0
4	15	1
4	5	1
4	13	1
4	10	1
4	2	0
4	7	1
4	1	1
4	8	1
4S	12	0
4	8	0
4	71	0
4	9	1
4	24	1
4	1	1
4	8	1
4	0.5	1
4	7	0
4	1	1
3	14	1
4	9	1
4	12	0
4	41	1
4	9	1
3	77	0
