# Supplementary material for: Neuroblastomas in Eastern China: a retrospective series study of 275 cases in a regional center
Source: PeerJ. 2018 Sep 17;6:e5665. doi: 10.7717/peerj.5665 (PMC6148411; doi:10.7717/peerj.5665)
Supplement: Supplemental Information 2 — MYCN status: N, unamplified, A, amplified; Outcome:1, dead of disease, 0, alive or lost follow-up. [file peerj-06-5665-s002.xlsx]

## Sheet: 神经母细胞瘤总结
MYCN status	time（months)	outcome
N	7	0
N	97	0
N	96	0
N	21	1
N	63	1
N	95	0
N	94	0
N	8	1
N	95	0
N	93	0
N	25	1
N	93	0
N	92	0
N	91	0
N	91	0
N	30	1
N	100	0
N	8	0
N	87	0
N	47	1
N	27	1
N	50	1
N	84	0
N	64	1
N	84	0
N	28	0
N	19	1
N	83	0
N	44	1
N	82	0
N	19	1
N	13	1
N	81	0
N	20	1
N	52	1
N	81	0
N	84	0
N	81	0
N	80	0
N	34	1
N	84	0
N	80	0
N	80	0
N	53	1
N	23	1
N	2	1
N	78	0
N	82	0
N	75	0
N	34	1
N	76	0
N	57	1
N	8	1
N	75	0
N	52	1
N	75	0
N	41	1
N	25	0
N	13	0
N	7	0
N	5	0
N	72	0
N	71	0
N	36	0
N	70	0
N	29	1
N	53	1
N	56	1
N	77	0
N	68	0
N	67	0
N	37	0
N	66	0
N	66	0
N	69	0
N	66	0
N	65	0
N	22	0
N	65	0
N	15	1
N	67	0
N	65	0
N	63	0
N	63	0
N	63	0
N	64	0
N	64	0
N	62	0
N	62	0
N	62	0
N	62	0
N	62	0
N	0.5	1
N	60	0
N	60	0
N	60	0
N	60	0
N	59	0
N	59	0
N	64	0
N	59	0
N	59	0
N	58	0
N	9	1
N	58	0
N	58	0
N	60	0
N	60	0
N	60	0
N	11	0
N	56	0
N	13	0
N	55	0
N	62	0
N	55	0
N	55	0
N	55	0
N	17	1
N	54	0
N	1.5	1
N	53	0
N	53	0
N	35	1
N	3	1
N	15	1
N	52	0
N	51	0
N	50	0
N	51	0
N	45	1
N	49	0
N	49	0
N	3	0
N	49	0
N	49	0
N	56	0
N	48	0
N	48	0
N	47	0
N	47	0
N	47	0
N	47	0
N	46	0
N	46	0
N	46	0
N	46	0
N	46	0
N	44	0
N	44	0
N	44	0
N	44	0
N	1	1
N	43	0
N	43	0
N	9	0
N	43	0
N	42	0
N	11	0
N	42	0
N	41	0
N	44	0
N	24	1
N	32	1
N	40	0
N	1	1
N	21	1
N	40	0
N	38	0
N	37	0
N	36	0
N	8	1
N	36	0
N	36	0
N	8	1
N	0.5	1
N	8	1
N	35	0
N	18	1
N	34	0
N	34	0
N	34	0
N	1	1
N	38	0
N	37	0
N	37	0
N	7	1
N	33	0
N	33	0
N	37	0
N	38	0
N	30	1
N	21	1
N	6	1
N	32	0
N	31	0
N	31	0
N	31	0
N	30	0
N	30	0
N	20	1
N	32	0
N	63	0
N	36	0
N	30	0
N	32	0
N	29	0
N	29	0
N	24	1
A	34	0
A	27	1
A	24	1
A	27	1
A	15	1
A	27	1
A	16	1
A	4	0
A	32	0
A	52	0
A	51	0
A	15	1
A	10	1
A	28	1
A	7	0
A	8	1
A	22	1
A	2	1
A	44	0
A	6	1
A	24	1
A	21	1
A	6	1
A	40	0
A	11	1
A	6	1
A	14	1
A	12	1
A	29	1
A	27	0
A	15	1
A	5	1
A	13	1
A	10	1
A	2	0
A	7	1
A	1	1
A	8	1
A	12	0
A	8	0
A	71	0
A	9	1
A	24	1
A	1	1
A	8	1
A	0.5	1
A	7	0
A	1	1
A	14	1
A	9	1
A	12	0
A	41	1
A	9	1
A	77	0
